# Supplementary material
Source: PubMed Central journal article supplement (PMC3817160)
Supplement: rna-10-1396-s01.pdf [file rna-10-1396-s01.pdf]

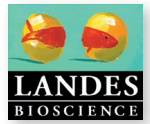

## **Supplemental Material to:**

**Shanzhi Wang, Eric J. Wagner, William Mattox**

**Half pint/Puf68 is required for negative regulation of  
splicing by the SR splicing factor Transformer2**

**2013; 10(8)**

**<http://dx.doi.org/10.4161/rna.25645>**

**[www.landesbioscience.com/journals/rnabiology/article/25645/](http://www.landesbioscience.com/journals/rnabiology/article/25645/)**

Figure S1

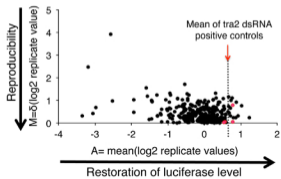

Scores ranking above the mean value of control *tra2* dsRNA

*tra2*  
CG4887  
*hfp/puf68*  
SF1  
*vas*  
cg12493  
Dhh1  
cg6418  
LIP4  
*lswi*

Figure S2

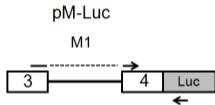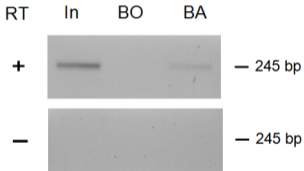

Figure S3

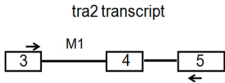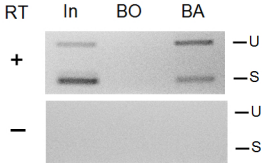

Figure S4

tra2 RNA

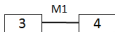

|                        |   |   |   |   |
|------------------------|---|---|---|---|
| Tra2 ( $\mu\text{M}$ ) | - | 1 | - | 1 |
| Hfp ( $\mu\text{M}$ )  | - | - | 1 | 1 |

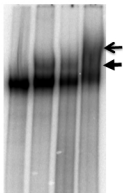

Figure S5

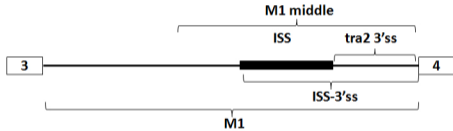

ISS tra2 3'ss ISS-3'ss  
- - -

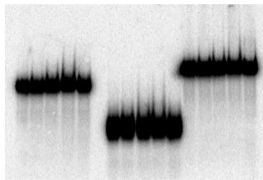

M1 middle M1 GST-Hfp  
- - -

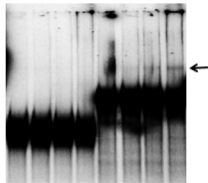

Figure S6

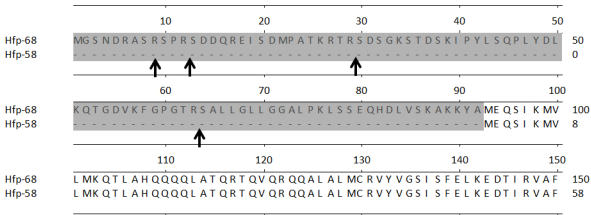

Figure S7

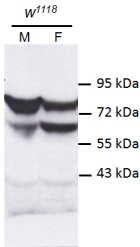



|                       |                            |                                                        |
|-----------------------|----------------------------|--------------------------------------------------------|
| actin promoter        | Actin 5C Sense             | 5'-ATGCCCTACTAGAAGATGTGT                               |
|                       | Actin 5C antisense         | 5'-CTCAAACGGTAGTGATATGAA                               |
| M1 reporter           | Tra2 M1 RNA sense          | 5'-TTTCATTTGGATTTGCCCCCT                               |
|                       | Tra2 M1 RNA antisense      | 5'-TTCGCGATCGCGTGATGAACG                               |
|                       | Luciferase cDNA sense      | 5'-GAAGACGCCAAAAACATAAAG                               |
|                       | Luciferase cDNA antisense  | 5'-TTACACGGCGATCTTTCCGCC                               |
|                       | SV40 signal sense          | 5'-GATCATAATCAGCCATACCAC                               |
|                       | SV40 signal antisense      | 5'-GATCCAGACATGATAAGATAC                               |
| ftz-based reporter    | ftz RNA sense              | 5'-ATGGACTACTTGGACGTCTACTCG                            |
|                       | ftz RNA antisense          | 5'-CTTGATCTGCCTTTTCGCTCAG                              |
|                       | mhc 3' 1 antisense         | 5'-CTTGTTTGCAAGGGGATAAGTTCAATGGGTTAGCTAATGAGTTTT       |
|                       | mhc 3' 2 antisense         | 5'-GTCTGACGGGTGCGTTTCGAGTCTTTGCAATCTTGTTTGCAAGGGGATAAG |
|                       | mhc 3' 3 antisense         | 5'-CTCGAGCTCCAGGGTCTGGTAGCGGGTGTACGTCTGACGGGTGCGTTTCGA |
|                       | ISS-mhc 3' 1 antisense     | 5'-CTTGTTTGCAAGGGGATAAGTTCAAAAATAAGATTATCTTGCGGTTCCG   |
| hfp and mutants cDNAs | Hfp68 cDNA sense           | 5'-ATGGACTACAAGGATGACGATGACAAGATGGGAAGCAACGACAGAGC     |
|                       | Hfp58 cDNA sense           | 5'-ATGGACTACAAGGATGACGATGACAAGATGGAGCAGAGCATCAAGATG    |
|                       | Hfp cDNA antisense         | 5'-CTAACCGGACAGATCTCCCTGATC                            |
|                       | Hfp $\Delta$ UHM antisense | 5'-CTAGTCCACCGCCGCATCAGTC                              |
| dsRNAs                | tra2 dsRNA sense           | 5'-CGGAATAGAAGTGGATGGTCCG                              |
|                       | tra2 dsRNA antisense       | 5'-TAGTTGCGGAGAGCGTGAAC                                |
|                       | Hfp3'UTR dsRNA sense       | 5'-TTAGAAGGGGGAGCTATCCG                                |
|                       | Hfp3'UTR dsRNA antisense   | 5'-GAATTGGAACTATAGTTTA                                 |
|                       | Hfp dsRNA sense            | 5'-GGTAGTGCCCACTCTTCCG                                 |
| Hfp dsRNA antisense   | 5'-AAAATGATAGAACAAATGCCGGG |                                                        |
